# Supplementary material for: Structural and functional differentiation of bacterial communities in post-coal mining reclamation soils of South Africa: bioindicators of soil ecosystem restoration
Source: PubMed Central journal article supplement (PMC7000389; doi:10.1038/s41598-020-58576-5), 2020-02-04
Supplement: 41598_2020_58576_MOESM1_ESM.pdf [file 41598_2020_58576_MOESM1_ESM.pdf]

1 **Supplementary Information**

2 **Title: Structural and functional differentiation of bacterial communities in post-coal**  
3 **mining reclamation soils of South Africa: bioindicators of soil ecosystem restoration**

4 **Authors:** Obinna T. Ezeokoli<sup>1,2,3</sup>, Cornelius C. Bezuidenhout<sup>1</sup>, Mark S. Maboeta<sup>1</sup>, Damase  
5 Khasa<sup>3,4</sup>, Rasheed A. Adeleke<sup>1,2\*</sup>

6

7 **Affiliations**

8 <sup>1</sup>Unit for Environmental Sciences and Management, North-West University, Potchefstroom  
9 2520, South Africa.

10 <sup>2</sup>Agricultural Research Council-Institute for Soil, Climate and Water, Arcadia, 0001, Pretoria,  
11 South Africa

12 <sup>3</sup>Institute for Integrative and Systems Biology, Universite Laval, Quebec City, QC G1V 0A6,  
13 Canada

14 <sup>4</sup>Centre for Forest Research, Faculty of Forestry, Geography and Geomatics, Universite Laval,  
15 Quebec City, QC G1V 0A6, Canada

16

17 \*Correspondence: [Rasheed.Adeleke@nwu.ac.za](mailto:Rasheed.Adeleke@nwu.ac.za).

18 **Supplementary Text (Methods)**

19

20 **Text S1: Brief method description of physicochemical analyses**

21 Briefly, pH was determined from a 1:2.5 soil-water suspension using a pre-calibrated pH meter  
22 (pH 700, Eutech Instruments Pte Ltd, Singapore). Particle size distribution was determined by  
23 the Bouyoucos method<sup>1</sup>. Cations and exchangeable cations were determined from ammonium  
24 acetate (1 M, pH 7) soil extracts using Inductively coupled plasma - optical emission  
25 spectrometry. Anions were determined from water extracts using Ion-exchange  
26 chromatography. BD determination was done after overnight drying (at 105°C) of soils  
27 collected on-site with a BD sampler.

28

29 **Text S2: Bioinformatics Analyses-quality trimming**

30 Quality trimming was performed using Trimmomatic software as follows: poor quality trailing  
31 and leading nucleotide positions were first trimmed from both forward and reverse reads.  
32 Thereafter, reads with an average quality score (Phred, Q) less than 20 and read length less  
33 than 250 bp were eliminated. For assembly, quality-trimmed forward and reverse reads were  
34 assembled and filtered for ambiguous bases (“N”) and spurious length (assembled read length  
35  $420 \text{ bp} \geq L \leq 466 \text{ bp}$ ) by using the Simple Bayesian algorithm and a threshold of 0.7 in  
36 PANDASeq software (v. 2.10)<sup>2</sup>.

37

38 **Text S3: Indicator species analysis**

39 Indicator species analysis assigns an indicator value (between 0 and 1) to each species in the  
40 cluster or group based on the product of the relative abundance and relative frequency of that  
41 species within the cluster (reclamation or reference). A high indicator value (close to 1)

42 suggests that a given species is highly abundant within a group compared to the other group  
43 (or groups) (referred to as “specificity”) and is present in most members of that group  
44 (referred to as “fidelity”)<sup>3</sup>. Tests for statistical significance of the indicator value was further  
45 determined through permutation (probability) tests<sup>4</sup>. In this study, the indicator species  
46 analysis was performed using the “indval ()” function in the labdsv package of R software <sup>4</sup>  
47 In this study, KO terms with FDR-adjusted  $P < 0.1$  between reclamation and reference soils  
48 of at least one site and with an indicator value  $> 0.6$  was adjudged discriminant between  
49 reference and reclamation soil.

50 **Supplementary Tables**51 **Table S1. Selected soil physicochemical properties**

| Properties <sup>1</sup>                | Site X                   |                            | Site Y                    |                            | Site Z                    |                            |
|----------------------------------------|--------------------------|----------------------------|---------------------------|----------------------------|---------------------------|----------------------------|
|                                        | Recl.                    | Ref.                       | Recl                      | Ref.                       | Recl                      | Ref.                       |
| Cl <sup>-</sup> (mg kg <sup>-1</sup> ) | 1.05±0.28 <sup>a</sup>   | 1.42±0.94 <sup>a</sup>     | 0.94±0.32 <sup>a</sup>    | 1.06±0.07 <sup>a</sup>     | 1.04±0.49 <sup>a</sup>    | 0.88±0.72 <sup>a</sup>     |
| Na (mg kg <sup>-1</sup> )              | 3.22±0.40 <sup>a</sup>   | 4.05±1.42 <sup>a</sup>     | 15.01±10.42 <sup>a</sup>  | 6.67±1.84 <sup>a</sup>     | 2.07±0.88 <sup>a</sup>    | 7.04±8.77 <sup>a</sup>     |
| K (mg kg <sup>-1</sup> )               | 22.88±1.58 <sup>a</sup>  | 40.56±23.35 <sup>a</sup>   | 79.27±13.28 <sup>a</sup>  | 75.27±14.43 <sup>a</sup>   | 77.30±17.09 <sup>a</sup>  | 69.50±19.47 <sup>a</sup>   |
| Ca (mg kg <sup>-1</sup> )              | 42.80±10.82 <sup>b</sup> | 176.48±126.09 <sup>a</sup> | 322.85±74.22 <sup>a</sup> | 1371.90±7.50 <sup>b</sup>  | 237.08±45.47 <sup>a</sup> | 226.84±120.26 <sup>a</sup> |
| Mg (mg kg <sup>-1</sup> )              | 10.76±2.22 <sup>b</sup>  | 37.01±20.27 <sup>a</sup>   | 147.03±35.52 <sup>b</sup> | 358.32±138.24 <sup>a</sup> | 57.89±32.05 <sup>a</sup>  | 43.39±22.58 <sup>a</sup>   |
| Textural class                         | SaClLm                   | SaLm                       | SaClLm                    | SaLm                       | SaClLm                    | SaLm                       |

52 <sup>1</sup>See also Table 1 for other physicochemical properties.

53

54 **Table S2: Community-level physiological profiling (31 Carbon substrate utilization pattern)**

| Site   | Soil group (Sample size) | Shannon-Weiner ( <i>H'</i> ) | Evenness ( <i>J'</i> ) |
|--------|--------------------------|------------------------------|------------------------|
| Site X | ReclX (N=3)              | 1.81±1.08                    | 0.62±0.33              |
|        | RefX (N=5)               | 1.86±0.51                    | 0.79±0.08              |
| Site Y | ReclY (N=5)              | 1.68±0.58                    | 0.73±0.21              |
|        | RefY (N=3)               | 1.91±0.20                    | 0.69±0.07              |
| Site Z | ReclZ (N=5)              | 1.37±0.89                    | 0.61±0.30              |
|        | RefZ (N=5)               | 1.36±0.72                    | 0.60±0.28              |

55 Values (mean ± SD). Differences are not significant ( $P < 0.05$ ) based on a mixed effect model

56 (Random effect, variance = 0.001145, Standard deviation = 0.03384).

57

58 **Table S3:** Permutational tests for microbial community structure between reclamation and  
 59 reference soils per site based on Bray-Curtis distances

| Factors                   | Unweighted Bray (composition) |          |          | Weighted Bray (Structure) |          |          |
|---------------------------|-------------------------------|----------|----------|---------------------------|----------|----------|
|                           | PERMANOVA                     | PERMDISP | PERMDISP | PERMANOVA                 | PERMDISP | PERMDISP |
|                           | R <sup>2</sup> (%)            | <i>P</i> | <i>P</i> | R <sup>2</sup> (%)        | <i>P</i> | <i>P</i> |
| Pair-wise site comparison |                               |          |          |                           |          |          |
| Site X                    | 29.20                         | 0.018    | 0.001    | 26.95                     | 0.090    | 0.001    |
| Site Y                    | 53.09                         | 0.018    | 0.120    | 51.50                     | 0.026    | 0.119    |
| Site Z                    | 13.58                         | 0.280    | 0.035    | 12.66                     | 0.406    | 0.058    |
| Sample-wide analyses      |                               |          |          |                           |          |          |
| Site                      | 27.29                         | 0.001    | 0.22     | 28.16                     | 0.001    | 0.263    |
| Soil History              | 6.70                          | 0.007    | 0.04     | 8.13                      | 0.004    | 0.032    |
| Site x Soil History       | 13.65                         | 0.001    | ND       | 14.80                     | 0.001    | ND       |

60 ND, Not determined. PERMANOVA tests were performed by using the “adonis ()” of the  
 61 vegan package of R software and are based on 999 iterations.

62 **Table S4:** Statistical test for discriminative genus-level features between reclamation and reference  
 63 soil. See Figure 4.

|                                                   | P values | FDR- adjusted<br>P-values | Class       | LDA score |
|---------------------------------------------------|----------|---------------------------|-------------|-----------|
| <i>Massilia</i>                                   | 0.003    | 0.337                     | Reclamation | 4.65      |
| <i>Sporosarcina</i>                               | 0.004    | 0.337                     | Reclamation | 3.49      |
| <i>Oryzihumus</i>                                 | 0.004    | 0.337                     | Reclamation | 4.36      |
| <i>Terrabacter</i>                                | 0.005    | 0.337                     | Reclamation | 4.09      |
| <i>Mucilaginibacter</i>                           | 0.006    | 0.337                     | Reclamation | 3.72      |
| <i>Oceanobacillus</i>                             | 0.007    | 0.337                     | Reclamation | 2.66      |
| <i>Janibacter</i>                                 | 0.007    | 0.337                     | Reclamation | 3.97      |
| <i>Sphingomonas</i>                               | 0.008    | 0.337                     | Reclamation | 5.2       |
| <i>Deinococcus</i>                                | 0.009    | 0.337                     | Reclamation | 2.74      |
| <i>Rhodanobacter</i>                              | 0.012    | 0.337                     | Reclamation | 3.61      |
| <i>Dokdonella</i>                                 | 0.013    | 0.337                     | Reclamation | 3.43      |
| <i>Segetibacter</i>                               | 0.014    | 0.337                     | Reclamation | 3.9       |
| <i>Phycoccus</i>                                  | 0.014    | 0.337                     | Reclamation | 3.73      |
| <i>Dyella</i>                                     | 0.016    | 0.337                     | Reclamation | 3.73      |
| <i>Fulvimonas</i>                                 | 0.017    | 0.337                     | Reclamation | 3.06      |
| <i>Streptomyces</i>                               | 0.019    | 0.337                     | Reclamation | 4.41      |
| <i>Clostridium sensu stricto 1</i>                | 0.021    | 0.337                     | Reclamation | 3.08      |
| <i>Opitutus</i>                                   | 0.026    | 0.380                     | Reclamation | 3.42      |
| <i>Arthrobacter</i>                               | 0.026    | 0.380                     | Reclamation | 3.82      |
| <i>Flavisolibacter</i>                            | 0.026    | 0.380                     | Reclamation | 4         |
| <i>Methylobacterium</i>                           | 0.034    | 0.383                     | Reclamation | 3.63      |
| <i>Candidatus Koribacter</i>                      | 0.034    | 0.383                     | Reclamation | 3.8       |
| <i>Jatrophihabitans</i>                           | 0.034    | 0.383                     | Reclamation | 4.04      |
| <i>Clostridium sensu stricto 12</i>               | 0.040    | 0.383                     | Reclamation | 2.75      |
| <i>Burkholderia-Caballeronia-Paraburkholderia</i> | 0.005    | 0.337                     | Reclamation | 4.43      |
| <i>Rubroacter</i>                                 | 0.003    | 0.337                     | Reference   | -3.6      |
| <i>Vicinamibacter</i>                             | 0.007    | 0.337                     | Reference   | -3.49     |
| <i>Chitinophaga</i>                               | 0.014    | 0.337                     | Reference   | -2.97     |
| <i>Lechevalieria</i>                              | 0.018    | 0.337                     | Reference   | -3.59     |
| <i>Chryseolinea</i>                               | 0.020    | 0.337                     | Reference   | -2.08     |
| <i>Sphingomicrobium</i>                           | 0.020    | 0.337                     | Reference   | -2.09     |
| <i>Rhodopirellula</i>                             | 0.020    | 0.337                     | Reference   | -2.53     |
| <i>Herpetosiphon</i>                              | 0.020    | 0.337                     | Reference   | -2.56     |
| <i>Hirschia</i>                                   | 0.020    | 0.337                     | Reference   | -2.8      |
| <i>Flavitalea</i>                                 | 0.029    | 0.383                     | Reference   | -3.05     |
| FFCH5858                                          | 0.030    | 0.383                     | Reference   | -2.64     |
| <i>Virgisporangium</i>                            | 0.030    | 0.383                     | Reference   | -2.67     |
| SWB02                                             | 0.032    | 0.383                     | Reference   | -2.83     |
| <i>Candidatus Protochlamydia</i>                  | 0.037    | 0.383                     | Reference   | -2.54     |

64

65 **Table S5:** Tax4Fun statistics for the functional prediction of soil bacterial communities

| Soil group | Average FTUs           | <sup>†</sup> 1-Average FTUs |
|------------|------------------------|-----------------------------|
| ReclX      | 0.89±0.02 <sup>a</sup> | 0.11±0.02 <sup>a</sup>      |
| RefX       | 0.86±0.03 <sup>a</sup> | 0.14±0.03 <sup>a</sup>      |
| ReclY      | 0.81±0.04 <sup>a</sup> | 0.19±0.04 <sup>a</sup>      |
| RefY       | 0.82±0.01 <sup>a</sup> | 0.18±0.01 <sup>a</sup>      |
| ReclZ      | 0.84±0.01 <sup>a</sup> | 0.16±0.01 <sup>a</sup>      |
| RefZ       | 0.85±0.04 <sup>a</sup> | 0.15±0.04 <sup>a</sup>      |

66 FTU, Fraction of OTUs which were not mapped against KEGG organisms.

67 <sup>†</sup>Fraction of OTUs which mapped onto the KEGG organisms is obtained by subtracting FTUs from

68 1.

69 **Table S6:** Pearson correlation coefficient (*r*) for the relationship between soil physicochemical  
70 properties and soil physiological data

| Physico-chemical ppts.                                  | Beta-glucosidase<br>(P-nitrophenol<br>μg/g/h) | Alk-<br>phosphatase (P-<br>nitrophenol<br>μg/g/h) | Acid-<br>phosphatase (P-<br>nitrophenol<br>μg/g/h) | Urease<br>(NH <sub>4</sub> -N<br>μg/g/2h) | Shannon-<br>Weiner<br>( <i>H'</i> ) | Evenness<br>( <i>J'</i> ) |
|---------------------------------------------------------|-----------------------------------------------|---------------------------------------------------|----------------------------------------------------|-------------------------------------------|-------------------------------------|---------------------------|
|                                                         | <i>r</i>                                      | <i>r</i>                                          | <i>r</i>                                           | <i>r</i>                                  | <i>r</i>                            | <i>r</i>                  |
| pH (H <sub>2</sub> O)                                   | 0.40                                          | 0.653**                                           | 0.103                                              | 0.64**                                    | 0.223                               | 0.003                     |
| Moisture (%)                                            | 0.439*                                        | 0.374                                             | 0.275                                              | 0.443*                                    | 0.164                               | 0.046                     |
| Organic matter (%)                                      | 0.064                                         | 0.188                                             | -0.024                                             | 0.253                                     | 0.091                               | -0.097                    |
| Bulk Density (g cm <sup>-3</sup> )                      | -0.335                                        | -0.133                                            | -0.375                                             | -0.265                                    | -0.100                              | -0.239                    |
| EC (mg kg <sup>-1</sup> )                               | -0.299                                        | -0.442*                                           | -0.337                                             | -0.256                                    | -0.222                              | -0.0299                   |
| Cl <sup>-</sup> (mg kg <sup>-1</sup> )                  | -0.089                                        | -0.319                                            | -0.265                                             | -0.178                                    | -0.397                              | -0.090                    |
| NO <sub>3</sub> <sup>-</sup> -N (mg kg <sup>-1</sup> )  | 0.015                                         | 0.178                                             | -0.084                                             | -0.299                                    | 0.248                               | 0.020                     |
| NO <sub>2</sub> <sup>-</sup> -N (mg kg <sup>-1</sup> )  | 0.334                                         | 0.418                                             | -0.080                                             | 0.346                                     | 0.483*                              | 0.195                     |
| PO <sub>4</sub> <sup>3-</sup> -P (mg kg <sup>-1</sup> ) | -0.254                                        | -0.201                                            | -0.059                                             | -0.433                                    | -0.240                              | -0.167                    |
| Na (mg kg <sup>-1</sup> )                               | -0.327                                        | 0.080                                             | -0.532**                                           | -0.052                                    | 0.194                               | 0.020                     |
| K (mg kg <sup>-1</sup> )                                | 0.460*                                        | 0.207                                             | 0.417*                                             | 0.602**                                   | -0.100                              | -0.188                    |
| Ca (mg kg <sup>-1</sup> )                               | 0.561**                                       | 0.510**                                           | 0.065                                              | 0.678**                                   | 0.144                               | -0.126                    |
| Mg (mg kg <sup>-1</sup> )                               | 0.351                                         | 0.478*                                            | 0.063                                              | 0.508*                                    | 0.093                               | -0.091                    |
| CEC (cmol (+) kg <sup>-1</sup> )                        | 0.162                                         | 0.273                                             | -0.355                                             | 0.100                                     | 0.286                               | 0.055                     |
| Sand (%)                                                | -0.08                                         | -0.179                                            | 0.15                                               | -0.13                                     | -0.25                               | -0.239                    |
| Silt (%)                                                | 0.34                                          | 0.1.69                                            | 0.169                                              | 0.32                                      | 0.02                                | 0.042                     |
| Clay (%)                                                | -0.428*                                       | -0.369                                            | -0.27                                              | -0.258                                    | -0.452*                             | -0.332                    |

71 \*Correlation is significant at 0.05 probability level.

72 \*\* Correlation is significant at the 0.01 probability level.



73 **Table S7:** Significance of terms (physicochemical properties) in the CCA model of Fig. 9.

| Constraints     | F       | Pr. (>F) |
|-----------------|---------|----------|
| Sand            | 2.2023  | 0.136    |
| Silt            | 5.5790  | 0.013*   |
| Clay            | 1.6856  | 0.199    |
| BD              | 4.3089  | 0.022*   |
| pH              | 25.7254 | 0.001*** |
| Moist           | 1.0265  | 0.360    |
| OM              | 1.8720  | 0.164    |
| EC              | 5.4034  | 0.015*   |
| Cl              | 1.5691  | 0.221    |
| NO <sub>3</sub> | 2.0760  | 0.174    |
| NO <sub>2</sub> | 1.4687  | 0.260    |
| PO <sub>4</sub> | 1.3124  | 0.272    |
| Na              | 3.4884  | 0.041*   |
| K               | 0.9829  | 0.393    |
| Ca              | 4.5304  | 0.026*   |
| Mg              | 1.0584  | 0.376    |
| CEC             | 1.5399  | 0.222    |

74 \* Significant at the 0.05 probability level

75 \*\*Significant at the 0.01 probability level

76 \*\*\*Significant at the 0.001 probability level

77 **Supplementary Figure**

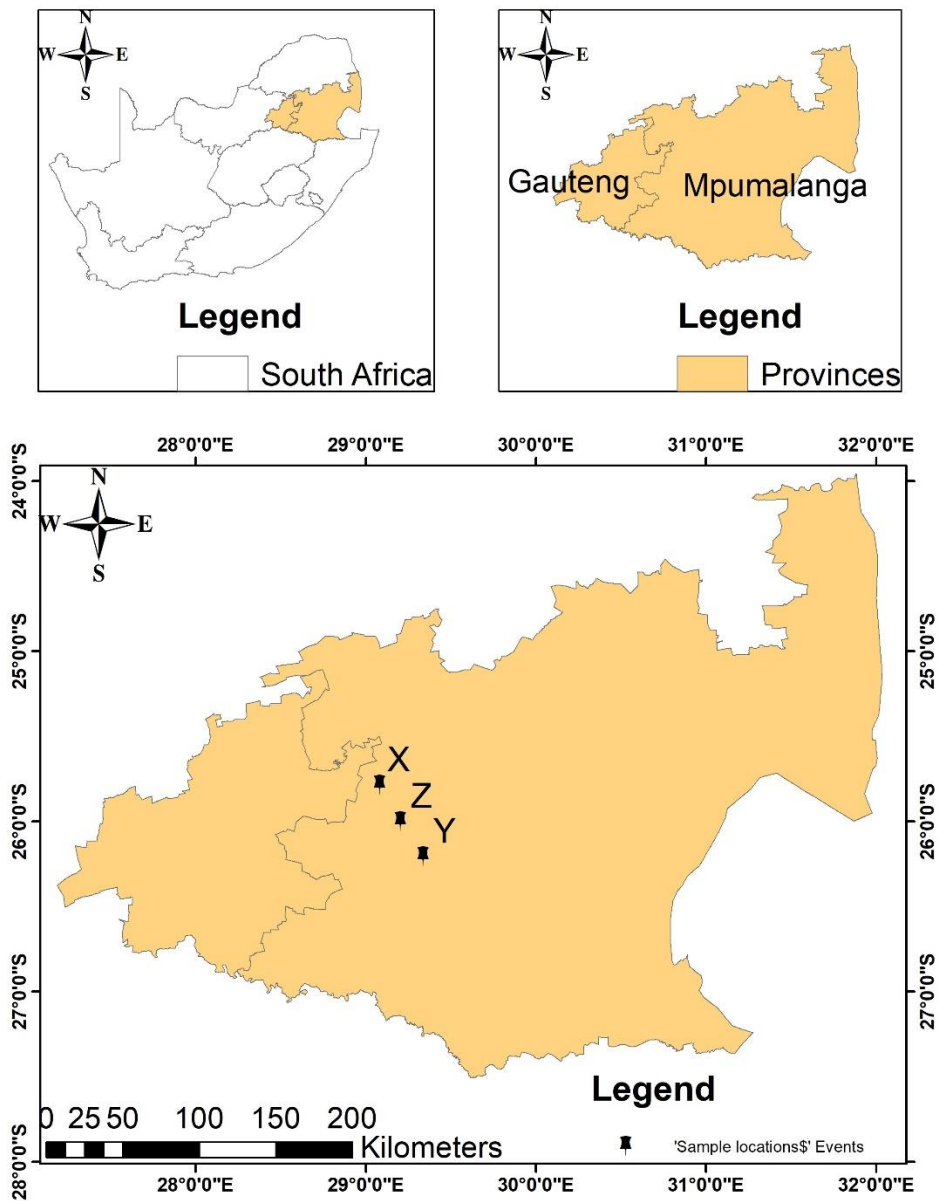

**Figure. S1**

78

79 **Figure S1:** Map of the sampling area. Site Y is approximately 67 km to the south of site X; site  
 80 Z is approximately 32 km to the south of site X, while site Z is approximately 41 km to the  
 81 north of site Y. Map was generated using the ArcMap software (v. 10.5; Esri, Redlands, CA,  
 82 USA) using a shapefile obtained from the North-West University University’s  
 83 ([www.nwu.ac.za](http://www.nwu.ac.za)) local Geo-Database archives.

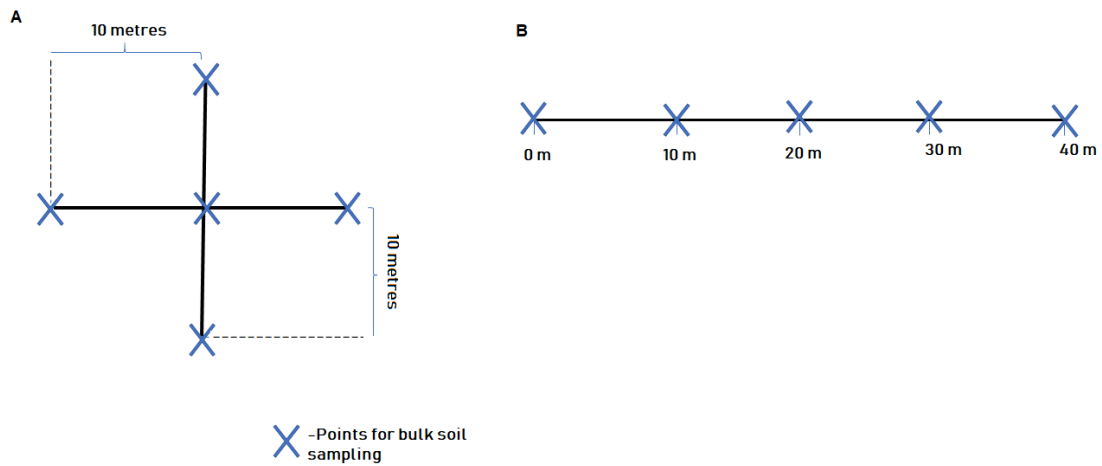

**Figure S2**

85

86 **Figure S2.** Schematic diagram for soil sampling designs. (A) Cross design. (B) Transect  
 87 method. The sampling design was aimed at obtaining representative samples and differed based  
 88 on the topography and dimension of the sites. Transect method was used in site X, while cross  
 89 designs were applied to site Y and Z. Samples were collected from each sampled area using 3-  
 90 5 transects or crosses which served as replicates.

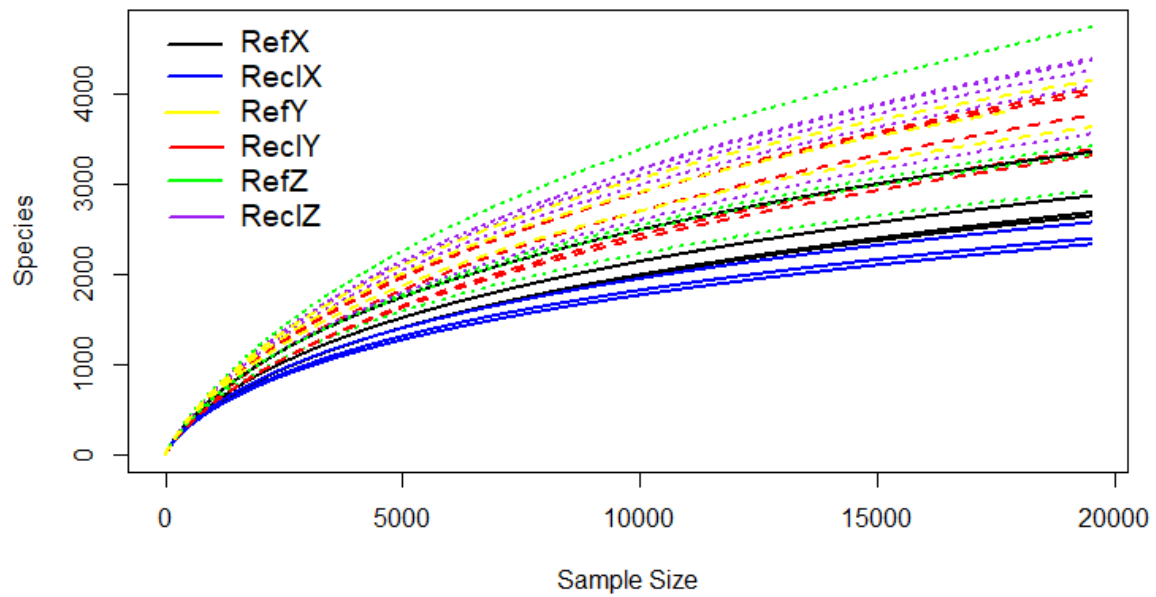

91

92 **Figure S3.** Rarefaction curve. Bacterial communities (97% 16S RNA gene similarity OTUs)  
 93 were subsampled at a depth of 19500 sequences per sample. The absence of a plateau in most  
 94 sites suggest that the richness of the community is underrepresented.

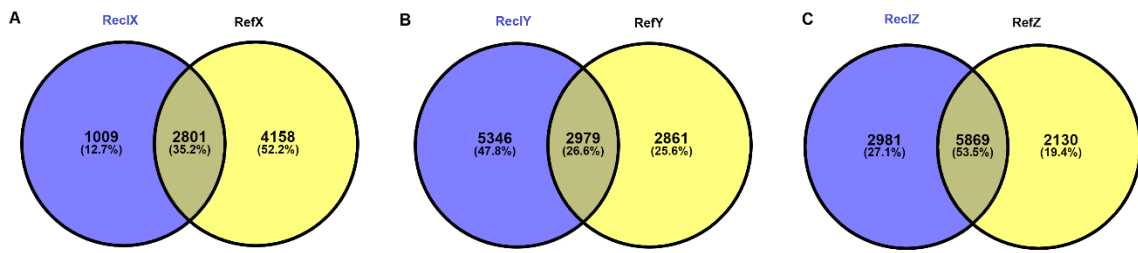

Figure S4

95

96 **Figure S4.** Unique and shared OTUs between and within sites. (A) Site X. (B) Site Y. (C) Site

97 Z. Total number of OTUs per set (or soil cluster) is the sum of unique OTUs in all replicates

98 for each soil group (e.g. site or history). The proportion (expressed in percentage) of OTUs

99 within each subset with respect to the total number of OTUs for any given sets are provided in

100 parenthesis. Venn diagram was constructed by using the online Venny 2.1 software available

101 from <http://bioinfogp.cnb.csic.es/tools/venny/>.<sup>5</sup>

102

103

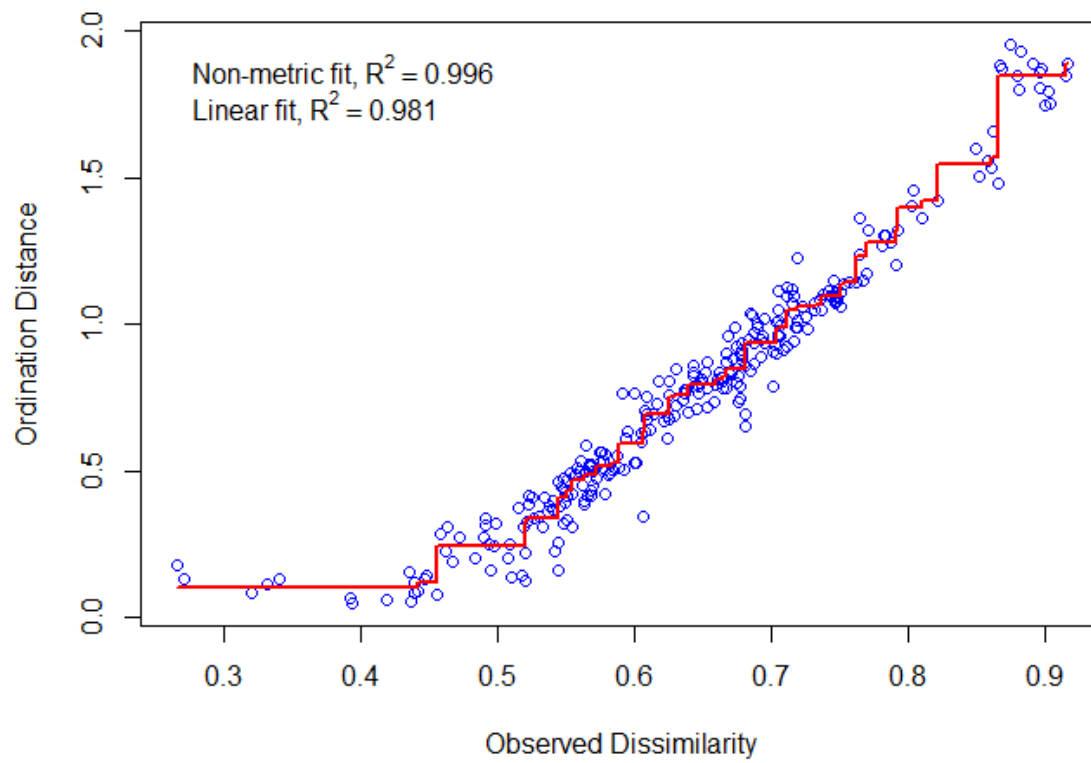

**Figure S5**

104

105 **Figure S5.** Stress plot for the non-metric multidimensional scaling plot of Figure 2a. Stress

106 plot was generated using the “stressplot ()” function of the Vegan package of R software<sup>6,7</sup>.

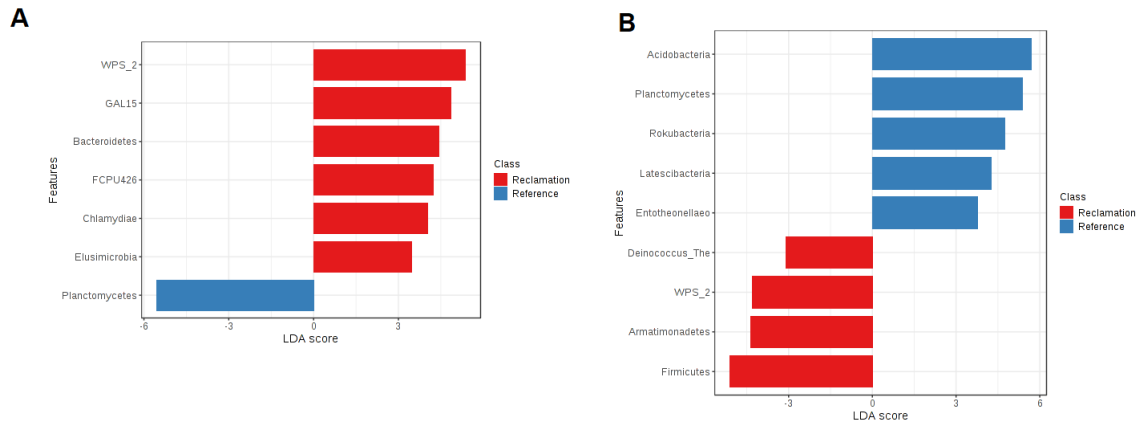

**Figure S6**

107

108 **Figure S6.** Differentially abundant phyla between bacterial communities of reclamation and  
 109 reference soils (A) Differentially abundant phyla (LDA score > 2.0, FDR-adjusted  $P$ -value <  
 110 0.1) in site X. (B) Differentially abundant phyla (LDA score > 2.0, FDR-adjusted  $P$ -value <  
 111 0.3) in Site Y. Differential abundance and bar plots were determined and generated,  
 112 respectively, using LefSe<sup>8</sup> via the Microbiome Analyst ([www.microbiomeanalyst.ca](http://www.microbiomeanalyst.ca))<sup>9</sup>.

113

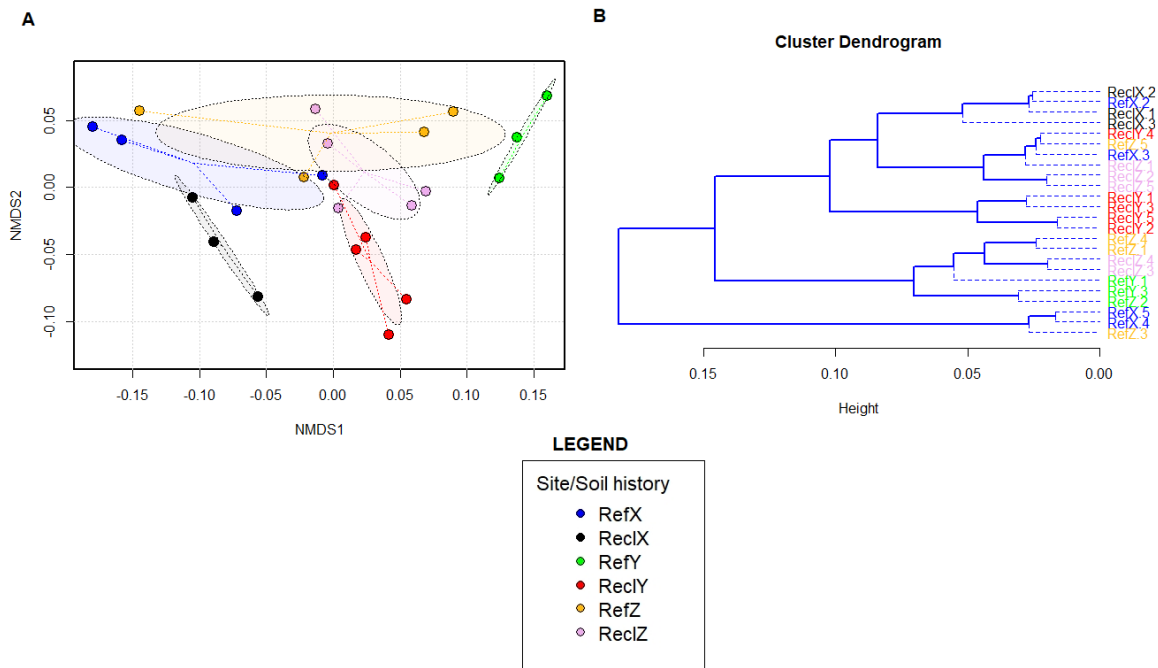

Figure S7

114

115 **Figure S7.** Bray-Curtis dissimilarity for predicted functional profile of soil bacterial  
 116 communities. (A). Non-metric dimensional scaling plot. (B). UPGMA hierarchical cluster  
 117 dendrogram. Dotted lines in the nMDS plot show the distance of every sample to its group  
 118 centroids in multivariate space, while ellipses show 95% confidence intervals (standard error)  
 119 in multivariate space around group centroids. The stress of the nMDS plot is 0.03. Differences  
 120 in multivariate space are significant for site and history interactions (PERMANOVA  $R^2 =$   
 121 7.91%,  $P = 0.045$ ; PERMDISP  $P = 0.016$ ).



122 **References**

- 123 1 Bouyoucos, G. J. Hydrometer method improved for making particle size analyses of  
 124 soils 1. *Agron. J.* **54**, 464-465 (1962).
- 125 2 Masella, A. P., Bartram, A. K., Truszkowski, J. M., Brown, D. G. & Neufeld, J. D.  
 126 PANDAseq: paired-end assembler for illumina sequences. *BMC Bioinformatics* **13**,  
 127 31, doi:10.1186/1471-2105-13-31 (2012).
- 128 3 Dufrene, M. & Legendre, P. Species assemblages and indicator species: the need for a  
 129 flexible asymmetrical approach. *Ecol. Monogr.* **67**, 345-366 (1997).
- 130 4 Roberts, D. W. labdsv: Ordination and multivariate analysis for ecology. *R package*  
 131 *version 1* (2007).
- 132 5 Oliveros, J. C. *Venny. An interactive tool for comparing lists with Venn's diagrams*  
 133 <http://bioinfogp.cnb.csic.es/tools/venny/index.html> (2007-2015).
- 134 6 Oksanen, J. *et al. vegan: Community Ecology Package* [https://CRAN.R-](https://CRAN.R-project.org/package=vegan)  
 135 [project.org/package=vegan](https://CRAN.R-project.org/package=vegan). (2019).
- 136 7 R: A language and environment for statistical computing (R Foundation for Statistical  
 137 Computing, Vienna, Austria, 2013).
- 138 8 Segata, N. *et al.* Metagenomic biomarker discovery and explanation. *Genome Biol.*  
 139 **12**, R60 (2011).
- 140 9 Dhariwal, A. *et al.* MicrobiomeAnalyst: a web-based tool for comprehensive  
 141 statistical, visual and meta-analysis of microbiome data. *Nucleic Acids Res.* **45**,  
 142 W180-W188 (2017).
